# Supplementary material
Source: PubMed Central journal article supplement (PMC3749047)
Supplement: NIHMS139567-supplement-01.pdf [file NIHMS139567-supplement-01.pdf]

Appendix  
Detection system for STD

| Ref. | Detection System                                                                                                                                                                     |                                                                                                 |                                                                                                                     |                                                                                          |
|------|--------------------------------------------------------------------------------------------------------------------------------------------------------------------------------------|-------------------------------------------------------------------------------------------------|---------------------------------------------------------------------------------------------------------------------|------------------------------------------------------------------------------------------|
|      | Gonorrhea                                                                                                                                                                            | Chlamydia                                                                                       | Syphilis                                                                                                            | Other                                                                                    |
| 33   | Culture of urethral or cervical swabs                                                                                                                                                | DNA probes of urethral or cervical swabs (Gen-Probe, San Diego, CA)                             | RPR plus MHA-TP or 4-fold increase in RPR titer is previously infected or darkfield microscopy of suspicious lesion | N/A                                                                                      |
| 38   | LCX probe of (body part) swab (Abbott, address)                                                                                                                                      | LCX probe of (body part) swab (Abbott, address)                                                 | N/A                                                                                                                 | T.vaginalis by In-Pouch TV test (BioMed Diagnostics, address)                            |
| 41   | Clinical diagnosis—visual inspection (re-infection)                                                                                                                                  | Clinical diagnosis—visual inspection (re-infection)                                             | Clinical diagnosis—visual inspection (re-infection)                                                                 | T.vaginalis by wet mount, microscopy                                                     |
| 49   | Individual STI testing not done. Presence of a newly-diagnosed STI made by chart review, and study staff were blinded to test results.                                               |                                                                                                 |                                                                                                                     |                                                                                          |
| 50   | Endocervical culture (female)<br>Gram(-) intracellular diplococci on urethral swab(male)                                                                                             | PCR endocervical swab (female)<br>PCR urine (male)                                              | Nontreponemal and treponemal serology                                                                               | N/A                                                                                      |
| 54   | Obtained by computerized records at STD clinics.<br><br>Clinical diagnosis or a positive smear/culture or due to a positive gonorrhea culture being given as reason for clinic visit | Obtained by computerized records at STD clinics.<br><br>Clinical diagnosis or positive culture. | Obtained by computerized records at STD clinics.<br><br>Clinician's diagnosis or positive culture                   | Clinical diagnosis of Lymphogranuloma venereum, chancroid, and nongonococcal urethritis. |
| 59   | Long Beach, Newark sites: LCR(LCx Uriprobe, Abbott Diagnostic Division, Abbott Park, IL).                                                                                            | Long Beach, Newark sites: LCR(LCx Uriprobe, Abbott Diagnostic Division, Abbott Park, IL).       | N/A                                                                                                                 | T.vaginalis by InPouch TV test (BioMed Diagnostics Inc., San Jose, CA) or                |

|    |                                                                                                                                                                                                 |                                                                                                                                                                                                 |              |                                                                        |
|----|-------------------------------------------------------------------------------------------------------------------------------------------------------------------------------------------------|-------------------------------------------------------------------------------------------------------------------------------------------------------------------------------------------------|--------------|------------------------------------------------------------------------|
|    | Denver site: PCR (Cobas Amplicor GC PCR; Roche Diagnostic Systems, Inc., Branchburg, NJ), and strand displacement amplification (SDA); (BDProbeTec ET CT/GC; BD Diagnostic Systems, Sparks, MD) | Denver site: PCR (Cobas Amplicor CT PCR; Roche Diagnostic Systems, Inc., Branchburg, NJ), and strand displacement amplification (SDA); (BDProbeTec ET CT/GC; BD Diagnostic Systems, Sparks, MD) |              | culture.                                                               |
| 60 | DNA amplification [ligase chain reaction (LCR)] of urine specimens<br><br>Chart review                                                                                                          | DNA amplification [ligase chain reaction (LCR)] of urine specimens<br><br>Chart review                                                                                                          | Chart review | Chart review for nongonococcal urethritis (males only), trichomoniasis |
| 61 | Utilized surveillance data by the New York City Department of Health to identify new infections, and did not break down STIs by individual diseases.                                            |                                                                                                                                                                                                 |              |                                                                        |
| 64 | DNA probes of endocervical samples Gen-Probe PACE 2 assay, Gen-Probe, San Diego, CA).                                                                                                           | DNA probes of endocervical samples (Gen-Probe PACE 2 assay, Gen-Probe, San Diego, CA).                                                                                                          | N/A          |                                                                        |
